# Supplementary material for: Reticulate sympatric speciation in Cameroonian crater lake cichlids
Source: Springer Nature journal article supplement (doi:10.1186/1742-9994-1-5), 2004-10-26

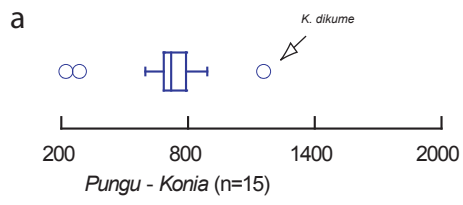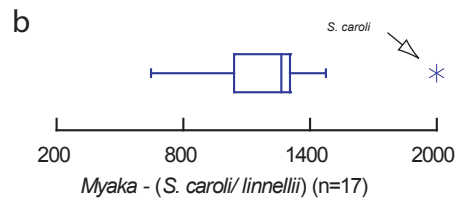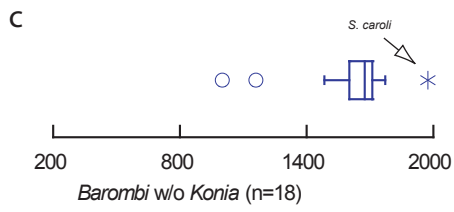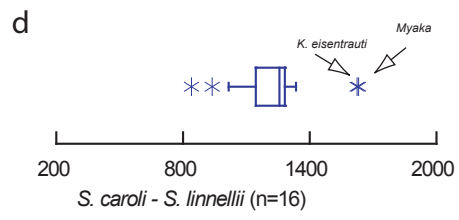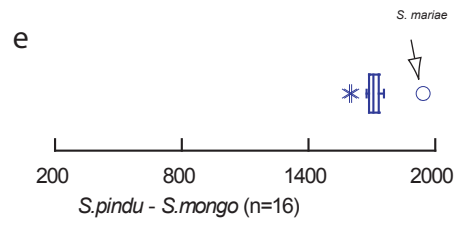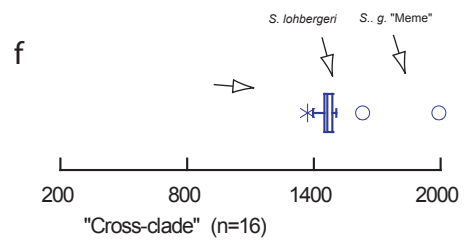

Supplement: 12983_2004_5_MOESM1_ESM.pdf [file 12983_2004_5_MOESM1_ESM.pdf]
